# Supplementary material
Source: publisher figshare collection journal article supplement (https://acs.figshare.com/ndownloader/files/24974493)
Supplement: Supplementary file 2 [file 24974493]

Archive with 3 entries (3 files):
- info.xml
- es0c02895_high_quality.mp4
- es0c02895.pdf
