# Supplementary material
Source: publisher figshare collection journal article supplement (https://acs.figshare.com/ndownloader/files/24974493)
Supplement: Supplementary file 2 [file 24974493 › info.xml]

<presentation>
	<article>
		<title>Infection Risk Assessment of COVID-19 through Aerosol Transmission: a Case Study of South China Seafood Market</title>
		<doi>10.1021/acs.est.0c02895</doi>
		<copyright>American Chemical Society</copyright>
		<narrator>Xiaole Zhang</narrator>
		<contact>Jing Wang</contact>
		<contact-email>jing.wang@ifu.baug.ethz.ch</contact-email>
		<author-list>
			<author>Jing Wang</author>
		</author-list>
	</article>
	<slides height-width-ratio=".75">
		<slide audio-time="20">
			<subtitle/>
		</slide>
		<slide audio-time="32">
			<subtitle/>
		</slide>
		<slide audio-time="16">
			<subtitle/>
		</slide>
		<slide audio-time="77">
			<subtitle/>
		</slide>
		<slide audio-time="40">
			<subtitle/>
		</slide>
		<slide audio-time="71">
			<subtitle/>
		</slide>
		<slide audio-time="51">
			<subtitle/>
		</slide>
		<slide audio-time="60">
			<subtitle/>
		</slide>
	</slides>
	<audio duration="367"/>
</presentation>
